# Supplementary material for: Construction of Unified Human Antimicrobial and Immunomodulatory Peptide Database and Examination of Antimicrobial and Immunomodulatory Peptides in Alzheimer’s Disease Using Network Analysis of Proteomics Datasets
Source: Front Genet. 2021 Apr 28;12:633050. doi: 10.3389/fgene.2021.633050 (PMC8113759; doi:10.3389/fgene.2021.633050)
Supplement: Supplementary file 1 [file Table_1.XLSX]

## Sheet: Brain
UDAMP ID	Gene Name	Protein Name	PXD009199	PXD008807	PXD012203	PXD004510	PXD005321	PXD000067	PXD014376	PXD006122	PXD014557	PMID: 30137212	PXD007694
UDAMP1	FAU	40S ribosomal protein S30	Decreased	No significant change	0	0	0	0	No significant change	0	0	0	0
UDAMP2	ADM	Adrenomedullin	0	0	0	0	0	0	0	0	0	0	0
UDAMP3	SERPINA1	Alpha-1-antitrypsin	No significant change	Increased	No significant change	No significant change	No significant change	0	No significant change	0	No significant change	0	0
UDAMP4	SNCA	Alpha-synuclein	No significant change	No significant change	No significant change	No significant change	0	0	No significant change	No significant change	No significant change	0	No significant change
UDAMP5	APP	Amyloid-beta precursor protein	Increased	Increased	No significant change	No significant change	Increased	Increased	Increased	No significant change	No significant change	Increased	Increased
UDAMP6	ANG	Angiogenin	0	0	0	0	0	0	0	0	0	0	0
UDAMP7	SLPI	Antileukoproteinase	0	No significant change	0	0	0	0	0	0	0	0	0
UDAMP8	ATP5F1B	ATP synthase subunit beta, mitochondrial	No significant change	0	No significant change	0	0	0	0	0	0	0	0
UDAMP9	AZU1	Azurocidin	0	0	0	0	0	0	0	0	0	0	0
UDAMP10	BPI	Bactericidal permeability-increasing protein	0	0	0	0	0	0	0	0	0	0	0
UDAMP11	B2M	Beta-2-microglobulin	No significant change	No significant change	0	0	No significant change	0	0	0	No significant change	0	Decreased
UDAMP12	CSN2	Beta-casein	0	0	0	0	0	0	0	0	0	0	0
UDAMP13	DEFB105B	Beta-defensin	0	0	0	0	0	0	0	0	0	0	0
UDAMP14	DEFB117	Beta-defensin	0	0	0	0	0	0	0	0	0	0	0
UDAMP15	DEFB1	Beta-defensin 1	0	0	0	0	0	0	0	0	0	0	0
UDAMP16	DEFB104A	Beta-defensin 104	0	0	0	0	0	0	0	0	0	0	0
UDAMP17	DEFB105A	Beta-defensin 105	0	0	0	0	0	0	0	0	0	0	0
UDAMP18	DEFB106A	Beta-defensin 106	0	0	0	0	0	0	0	0	0	0	0
UDAMP19	DEFB107A	Beta-defensin 107	0	0	0	0	0	0	0	0	0	0	0
UDAMP20	DEFB108A	Beta-defensin 108A	0	0	0	0	0	0	0	0	0	0	0
UDAMP21	DEFB112	Beta-defensin 112	0	0	0	0	0	0	0	0	0	0	0
UDAMP22	DEFB118	Beta-defensin 118	0	0	0	0	0	0	0	0	0	0	0
UDAMP23	DEFB119	Beta-defensin 119	0	0	0	0	0	0	0	0	0	0	0
UDAMP24	DEFB125	Beta-defensin 125	0	0	0	0	0	0	0	0	0	0	0
UDAMP25	DEFB126	Beta-defensin 126	0	0	0	0	0	0	0	0	0	0	0
UDAMP26	DEFB127	Beta-defensin 127	0	0	0	0	0	0	0	0	0	0	0
UDAMP27	DEFB128	Beta-defensin 128	0	0	0	0	0	0	0	0	0	0	0
UDAMP28	DEFB130	Beta-defensin 130	0	0	0	0	0	0	0	0	0	0	0
UDAMP29	DEFB4A	Beta-defensin 4A	0	0	0	0	0	0	0	0	0	0	0
UDAMP30	DEFB103A	Beta-defensin103	0	0	0	0	0	0	0	0	0	0	0
UDAMP31	DEFB108B	Beta-defensin108B	0	0	0	0	0	0	0	0	0	0	0
UDAMP32	DEFB109B	Beta-defensin109	0	0	0	0	0	0	0	0	0	0	0
UDAMP33	DEFB110	Beta-defensin111	0	0	0	0	0	0	0	0	0	0	0
UDAMP34	DEFB113	Beta-defensin113	0	0	0	0	0	0	0	0	0	0	0
UDAMP35	DEFB114	Beta-defensin114	0	0	0	0		0	0	0	0	0	0
UDAMP36	DEFB115	Beta-defensin115	0	0	0	0	0	0	0	0	0	0	0
UDAMP37	DEFB116	Beta-defensin116	0	0	0	0	0	0	0	0	0	0	0
UDAMP38	DEFB121	Beta-defensin121	0	0	0	0	0	0	0	0	0	0	0
UDAMP39	DEFB123	Beta-defensin123	0	0	0	0	0	0	0	0	0	0	0
UDAMP40	DEFB124	Beta-defensin124	0	0	0	0	0	0	0	0	0	0	0
UDAMP41	DEFB128	Beta-defensin128	0	0	0	0	0	0	0	0	0	0	0
UDAMP42	DEFB129	Beta-defensin129	0	0	0	0	0	0	0	0	0	0	0
UDAMP43	DEFB131A	Beta-defensin131A	0	0	0	0	0	0	0	0	0	0	0
UDAMP44	DEFB132	Beta-defensin132	0	0	0	0	0	0	0	0	0	0	0
UDAMP45	DEFB133	Beta-defensin133	0	0	0	0	0	0	0	0	0	0	0
UDAMP46	DEFB134	Beta-defensin134	0	0	0	0	0	0	0	0	0	0	0
UDAMP47	DEFB135	Beta-defensin135	0	0	0	0	0	0	0	0	0	0	0
UDAMP48	DEFB136	Beta-defensin136	0	0	0	0	0	0	0	0	0	0	0
UDAMP49	PRG2	Bone marrow proteoglycan	0	0	0	0	0	0	0	0	0	0	0
UDAMP50	BST2	Bone marrow stromal antigen 2	0	0	0	0	0	0	0	0	No significant change	0	0
UDAMP51	BPIFA1	BPI fold-containing family A member 1 precursor	0	0	No significant change	0	0	0	0	0	0	0	0
UDAMP52	BPIFA2	BPI fold-containing family A member 2 (Parotid secretory protein) (PSP) (Short palate, lung and nasal epithelium carcinoma-associated protein 2)	0	0	0	0	0	0	0	0	0	0	0
UDAMP53	BPIFB3	BPI fold-containing family B member 3	0	0	0	0	0	0	0	0	0	0	0
UDAMP54	BPIFB4	BPI fold-containing family B member 4	0	0	0	0	0	0	0	0	0	0	0
UDAMP55	CALCA	Calcitonin gene-related peptide 1	0	0	0	0	0	0	0	0	0	0	0
UDAMP56	CAMP	Cathelicidin antimicrobial peptide	0	0	0	0	0	0	0	0	0	0	0
UDAMP57	CTSG	Cathepsin G	0	0	0	0	0	0	0	0	0	0	0
UDAMP58	CCL1	C-C motif chemokine 1	0	0	0	0	0	0	0	0	0	0	0
UDAMP59	CCL13	C-C motif chemokine 13	0	0	0	0	0	0	0	0	0	0	0
UDAMP60	CCL17	C-C motif chemokine 17	0	0	0	0	0	0	0	0	0	0	0
UDAMP61	CCL18	C-C motif chemokine 18	0	0	0	0	0	0	0	0	0	0	0
UDAMP62	CCL19	C-C motif chemokine 19	0	0	0	0	0	0	0	0	0	0	0
UDAMP63	CCL20	C-C motif chemokine 20	0	0	0	0	0	0	0	0	0	0	0
UDAMP64	CCL21	C-C motif chemokine 21	0	0	0	0	0	0	0	0	0	0	0
UDAMP65	CCL22	C-C motif chemokine 22	0	0	0	0	0	0	0	0	0	0	0
UDAMP66	CCL24	C-C motif chemokine 24	0	0	0	0	0	0	0	0	0	0	0
UDAMP67	CCL25	C-C motif chemokine 25	0	0	0	0	0	0	0	0	0	0	0
UDAMP68	CCL27	C-C motif chemokine 27	0	0	0	0	0	0	0	0	0	0	0
UDAMP69	CCL28	C-C motif chemokine 28	0	0	0	0	0	0	0	0	0	0	0
UDAMP70	CCL4	C-C motif chemokine 4	0	0	0	0	0	0	0	0	0	0	0
UDAMP71	CCL8	C-C motif chemokine 8	0	0	0	0	0	0	0	0	0	0	0
UDAMP72	CHGA	Chromogranin-A	No significant change	Increased	0	0	0	0	0	0	No significant change	0	No significant change
UDAMP73	CLU	Clusterin	No significant change	Increased	No significant change	No significant change	No significant change	0	No significant change	0	No significant change	Increased	Decreased
UDAMP74	CXCL10	C-X-C motif chemokine 10	0	0	0	0	0	0	0	0	0	0	0
UDAMP75	CXCL11	C-X-C motif chemokine 11	0	0	0	0	0	0	0	0	0	0	0
UDAMP76	CXCL13	C-X-C motif chemokine 13	0	0	0	0	0	0	0	0	0	0	0
UDAMP77	CXCL14	C-X-C motif chemokine 14	0	0	0	0	0	0	0	0	0	0	0
UDAMP78	CXCL2	C-X-C motif chemokine 2	0	0	0	0	0	0	0	0	0	0	0
UDAMP79	CXCL3	C-X-C motif chemokine 3	0	0	0	0	0	0	0	0	0	0	0
UDAMP80	CXCL6	C-X-C motif chemokine 6	0	0	0	0	0	0	0	0	0	0	0
UDAMP81	CXCL9	C-X-C motif chemokine 9	0	0	0	0	0	0	0	0	0	0	0
UDAMP82	CST11	Cystatin-11	0	0	0	0	0	0	0	0	0	0	0
UDAMP83	CST5	Cystatin-D	0	0	0	0	0	0	0	0	0	0	0
UDAMP84	CST4	Cystatin-S	0	0	0	0	0	0	0	0	0	0	0
UDAMP85	CST2	Cystatin-SA	0	0	0	0	0	0	0	0	0	0	0
UDAMP86	CST1	Cystatin-SN	0	0	0	0	0	0	0	0	0	0	0
UDAMP87	DEFA3	Defensin, alpha 3, neutrophil-specific	0	0	0	0	0	0	0	0	0	0	0
UDAMP88	DEFA5	Defensin-5	0	0	0	0	0	0	0	0	0	0	0
UDAMP89	DEFA6	Defensin-6	0	0	0	0	0	0	0	0	0	0	0
UDAMP90	DMBT1	Deleted in malignant brain tumors 1 protein	0	0	0	0	0	0	No significant change	0	No significant change	0	0
UDAMP91	DCD	Dermcidin	0	No significant change	0	0	No significant change	0	0	0	No significant change	0	No significant change
UDAMP92	APOBEC3G	DNA dC->dU-editing enzyme APOBEC-3G	0	0	0	0	0	0	0	0	0	0	0
UDAMP93	PI3	Elafin	0	0	0	0	0	0	0	0	0	0	0
UDAMP94	RNASE3	Eosinophil cationic protein	0	0	0	0	0	0	0	0	0	0	0
UDAMP95	CCL11	Eotaxin	0	0	0	0	0	0	0	0	0	0	0
UDAMP96	LACRT	Extracellular glycoprotein lacritin	0	0	0	0	0	0	0	0	0	0	0
UDAMP97	FGA	Fibrinogen alpha chain	No significant change	Increased	No significant change	No significant change	No significant change	0	No significant change	0	No significant change	0	0
UDAMP98	FLG2	Filaggrin-2	0	0	0	0	No significnat change	0	0	0	No significant change	0	0
UDAMP99	FURIN	Furin	0	0	0	0	0	0	0	0	0	0	0
UDAMP100	GALP	Galanin-like peptide	0	0	0	0	0	0	0	0	0	0	0
UDAMP101	LGALS3	Galectin-3	No significant change	No significant change	No significant change	No significant change	No significant change	0	0	0	No significant change	0	0
UDAMP102	GAPDH	Glyceraldehyde-3-phosphate dehydrogenase	No significant change	No significant change	0	No significant change	No significant change	0	No significant change	0	No significant change	No significant change	0
UDAMP103	GNLY	Granulysin	0	0	0	0	0	0	0	0	0	0	0
UDAMP104	CXCL1	Growth-regulated alpha protein	0	0	0	0	0	0	0	0	0	0	0
UDAMP105	GBP1	Guanylate-binding protein 1	No significant change	No significant change	0	0	0	0	0	0	No significant change	0	0
UDAMP106	GBP2	Guanylate-binding protein 2	0	No significant change	0	0	0	0	0	0	No significant change	0	0
UDAMP107	HP	Haptoglobin beta chain	No significant change	No significant change	No significant change	No significant change	Increased	0	No significant change	0	No significant change	0	0
UDAMP108	SERPIND1	Heparin cofactor 2	0	0	0	0	0	0	0	0	No significant change	0	0
UDAMP109	HAMP	Hepcidin	0	0	0	0	0	0	0	0	0	0	0
UDAMP110	HAMP	Hepicidin-20	0	0	0	0	0	0	0	0	0	0	0
UDAMP111	HTN1	Histatin-1	0	0	0	0	No significnant change	0	0	0	0	0	0
UDAMP112	HTN3	Histatin-3	0	0	0	0	0	0	0	0	0	0	0
UDAMP113	HTN3	Histatin-5	0	0	0	0	0	0	0	0	0	0	0
UDAMP114	HTN3	Histatin-8	0	0	0	0	0	0	0	0	0	0	0
UDAMP115	HRG	Histidine-rich glycoprotein	0	No significant change	0	0	0	0	0	0	No significant change	0	0
UDAMP116	H2AFJ	Histone H2A.J	0	0	0	0	0	0	0	0	0	0	0
UDAMP117	HIST1H2BC	Histone H2B type 1-C/E/F/G/I	0	No significant change	No significant change	0	No significant change	0	No significant change	0	0	0	0
UDAMP118	HRNR	Hornerin	0	0	0	0	0	0	0	0	No significant change	0	0
UDAMP119	IFNA2	Interferon alpha-2	0	0	0	0	0	0	0	0	0	0	0
UDAMP120	IFNL3	Interferon lambda-3	0	0	0	0	0	0	0	0	0	0	0
UDAMP121	MX1	Interferon-induced GTP-binding protein Mx1	0	No significant change	0	0	No significant change	0	0	0	No significant change	0	0
UDAMP122	IFIH1	Interferon-induced helicase C domain-containing protein 1	0	0	0	0	0	0	0	0	0	0	0
UDAMP123	ISG20	Interferon-stimulated gene 20 kDa protein	0	0	0	0	0	0	0	0	0	0	0
UDAMP124	IL26	Interleukin-26	0	0	0	0	0	0	0	0	0	0	0
UDAMP125	CXCL8	Interleukin-8	0	0	0	0	0	0	0	0	0	0	0
UDAMP126	IAPP	Islet amyloid polypeptide	0	0	0	0	0	0	0	0	0	0	0
UDAMP127	KLK5	Kallikrein-5	0	0	0	0	0	0	0	0	0	0	0
UDAMP128	KRT6C	Keratin, type II cytoskeletal 6C	0	0	0	0	0	0	0	0	0	0	0
UDAMP129	KNG1	Kininogen-1	No significant change	No significant change	0	0	0	0	0	0	No significant change	0	0
UDAMP130	LTF	Lactotransferrin	0	No significant change	0	0	0	0	0	0	No significant change	0	0
UDAMP131	LCN1	Lipocalin-1	0	0	0	0	0	0	0	0	No significant change	0	0
UDAMP132	LEAP2	Liver-expressed antimicrobial peptide 2	0	0	0	0	0	0	0	0	0	0	0
UDAMP133	XCL1	Lymphotactin	0	0	0	0	0	0	0	0	0	0	0
UDAMP134	LYZ	Lysozyme C	0	0	0	0	0	0	0	0	No significant change	0	0
UDAMP135	SCGB2A1	Mammaglobin-B	0	0	0	0	0	0	0	0	0	0	0
UDAMP136	POMC	Melanocyte-stimulating hormone alpha(Pro-opiomelanocortin)	0	0	0	0	0	0	0	0	0	0	0
UDAMP137	MUC7	Mucin-7	0	0	0	0	0	0	0	0	0	0	0
UDAMP138	NPPB	Natriuretic peptides B	0	0	0	0	0	0	0	0	0	0	0
UDAMP139	NPY	Neuropeptide Y	No significant change	No significant change	0	0	0	0	0	No significant change	0	0	0
UDAMP140	VGF	Neurosecretory protein VGF	Decreased	No significant change	0	0	No significant change	0	0	No significant change	No significant change	0	0
UDAMP141	NTS	Neurotensin	0	0	0	0	0	0	0	0	0	0	0
UDAMP142	DEFA1	Neutrophil defensin 1	0	0	0	0	0	0	0	0	0	0	0
UDAMP143	DEFA3	Neutrophil defensin 3	0	0	0	0	0	0	0	0	0	0	0
UDAMP144	DEFA4	Neutrophil defensin 4	0	0	0	0	0	0	0	0	0	0	0
UDAMP145	LCN2	Neutrophil gelatinase-associated lipocalin	0	0	0	0	0	0	0		0	0	0
UDAMP146	HMGN2	Non-histone chromosomal protein HMG-17	0	0	0	0	0	0	0	0	No significant change	0	0
UDAMP147	PYY	Peptide YY	0	0	0	0	0	0	0	0	0	0	0
UDAMP148	PGLYRP3	Peptidoglycan recognition protein 3	0	0	0	0	0	0	0	0	0	0	0
UDAMP149	PGLYRP4	Peptidoglycan recognition protein 4	0	0	0	0	0	0	0	0	0	0	0
UDAMP150	PRF1	Perforin-1	0	0	0	0	0	0	0	0	0	0	0
UDAMP151	PLA2G2A	Phospholipase A2, membrane associated	0	0	0	0	0	0	0	0	0	0	0
UDAMP152	PPBP	Platelet Basic protein	0	No significant change	0	0	0	0	0	0	0	0	0
UDAMP153	PF4	Platelet factor 4	0	0	0	0	0	0	0	0	0	0	0
UDAMP154	PIGR	Polymeric immunoglobulin receptor	0	0	0	0	0	0	0	0	No significant change	0	0
UDAMP155	PRR4	Proline-rich protein 4	0	0	0	0	0	0	0	0	0	0	0
UDAMP156	TOR2A	Prosalusin	0	0	0	0	0	0	0	0	0	0	0
UDAMP157	TAC1	Protachykinin-1	0	0	0	0	0	0	0	Increased	0	0	0
UDAMP158	GPR15L	Protein GPR15L	0	0	0	0	0	0	0	0	0	0	0
UDAMP159	S100A12	Protein S100-A12	0	Increased	0	0	0	0	0	0	0	0	0
UDAMP160	S100A7	Protein S100-A7	0	0	0	0	0	0	0	0	no significant change	0	0
UDAMP161	S100A9	Protein S100-A9	0	Increased	0	0	No significant change	0	0	0	No significant change	0	0
UDAMP162	F2	Prothrombin	0	0	0	0	0	0	0	0	No significant change	0	0
UDAMP163	IQGAP2	Ras GTPase-activating-like protein IQGAP2	0	0	0	0	0	0	0	0	No significant change	0	0
UDAMP164	ROMO1	Reactive oxygen species modulator 1	No significant change	0	0	0	0	0	0	0	0	0	0
UDAMP165	REG3A	Regenerating islet-derived protein 3-alpha	0	0	0	0	0	0	0	0	0	0	0
UDAMP166	RETN	Resistin	0	0	0	0	0	0	0	No significant change	0	0	0
UDAMP167	RARRES2	Retinoic acid receptor responder protein 2	0	0	0	0	0	0	0	0	0	0	0
UDAMP168	DLC1	Rho GTPase-activating protein 7	No significant change	0	0	0	0	0	0	0	0	0	0
UDAMP169	RNASE8	Ribonuclease 8	0	0	0	0	0	0	0	0	0	0	0
UDAMP170	RNASE6	Ribonuclease K6	0	0	0	0	0	0	0	0	0	0	0
UDAMP171	RNASE7	Ribonuclease7	0	0	0	0	0	0	0	0	0	0	0
UDAMP172	SALV	Salivary gland antimicrobial salvic	0	0	0	0	0	0	0	0	0	0	0
UDAMP173	SCGB1D1	Secretoglobin family 1D member 1	0	0	0	0	0	0	0	0	0	0	0
UDAMP174	SEMG1	Semenogelin-1	0	0	0	0	0	0	0	0	0	0	0
UDAMP175	SEMG2	Semenogelin-2	0	0	0	0	0	0	0	0	0	0	0
UDAMP176	SPINK9	Serine protease inhibitor Kazal-type 9	0	0	0	0	0	0	0	0	0	0	0
UDAMP177	SPAG11B	Sperm-associated antigen 11B	0	0	0	0	0	0	0	0	0	0	0
UDAMP178	CXCL12	Stromal cell-derived factor 1	0	0	0	0	0	0	0	0	0	0	0
UDAMP179	DCD	Survival-promoting peptide, Y-P30	0	0	0	0	No significant change	0	0	0	0	0	No significant change
UDAMP180	TSLP	Thymic stromal lymphopoietin	0	0	0	0	0	0	0	0	0	0	0
UDAMP181	SP1	Transcription factor Sp1	0	0	0	0	0	0	0	0	0	0	0
UDAMP182	VIP	VIP peptides	0	0	0	No significant change	0	0	0	0	0	0	0
UDAMP183	WFDC12	WAP four-disulfide core domain protein12	0	0	0	0	0	0	0	0	0	0	0
UDAMP184	AZGP1	Zinc-alpha-2-glycoprotein	0	No significant change	0	0	0	0	0	0	No significant change	0	0
UDAMP185	ZG16B	Zymogen granule protein 16 homolog B	0	0	0	0	0	0	0	0	No significant change	0	0
											`

## Sheet: Blood
UDAMP ID	Gene Name	Protein Name	PMID :27911324	PXD011482
UDAMP1	FAU	40S ribosomal protein S30	0	No significant change
UDAMP2	ADM	Adrenomedullin	0	No significant change
UDAMP3	SERPINA1	Alpha-1-antitrypsin	Decreased	No significant change
UDAMP4	SNCA	Alpha-synuclein	0	No significant change
UDAMP5	APP	Amyloid-beta precursor protein	Increased	No significant change
UDAMP6	ANG	Angiogenin	0	No significant change
UDAMP7	SLPI	Antileukoproteinase	0	0
UDAMP8	ATP5F1B	ATP synthase subunit beta, mitochondrial	0	0
UDAMP9	AZU1	Azurocidin	0	No significant change
UDAMP10	BPI	Bactericidal permeability-increasing protein	0	No significant change
UDAMP11	B2M	Beta-2-microglobulin	0	0
UDAMP12	CSN2	Beta-casein	0	0
UDAMP13	DEFB105B	Beta-defensin	0	0
UDAMP14	DEFB117	Beta-defensin	0	0
UDAMP15	DEFB1	Beta-defensin 1	0	0
UDAMP16	DEFB104A	Beta-defensin 104	0	0
UDAMP17	DEFB105A	Beta-defensin 105	0	0
UDAMP18	DEFB106A	Beta-defensin 106	0	0
UDAMP19	DEFB107A	Beta-defensin 107	0	0
UDAMP20	DEFB108A	Beta-defensin 108A	0	0
UDAMP21	DEFB112	Beta-defensin 112	0	0
UDAMP22	DEFB118	Beta-defensin 118	0	0
UDAMP23	DEFB119	Beta-defensin 119	0	0
UDAMP24	DEFB125	Beta-defensin 125	0	0
UDAMP25	DEFB126	Beta-defensin 126	0	0
UDAMP26	DEFB127	Beta-defensin 127	0	0
UDAMP27	DEFB128	Beta-defensin 128	0	0
UDAMP28	DEFB130	Beta-defensin 130	0	0
UDAMP29	DEFB4A	Beta-defensin 4A	0	0
UDAMP30	DEFB103A	Beta-defensin103	0	No significant change
UDAMP31	DEFB108B	Beta-defensin108B	0	0
UDAMP32	DEFB109B	Beta-defensin109	0	0
UDAMP33	DEFB110	Beta-defensin111	0	0
UDAMP34	DEFB113	Beta-defensin113	0	0
UDAMP35	DEFB114	Beta-defensin114	0	0
UDAMP36	DEFB115	Beta-defensin115	0	0
UDAMP37	DEFB116	Beta-defensin116	0	0
UDAMP38	DEFB121	Beta-defensin121	0	0
UDAMP39	DEFB123	Beta-defensin123	0	0
UDAMP40	DEFB124	Beta-defensin124	0	0
UDAMP41	DEFB128	Beta-defensin128	0	0
UDAMP42	DEFB129	Beta-defensin129	0	0
UDAMP43	DEFB131A	Beta-defensin131A	0	0
UDAMP44	DEFB132	Beta-defensin132	0	0
UDAMP45	DEFB133	Beta-defensin133	0	0
UDAMP46	DEFB134	Beta-defensin134	0	0
UDAMP47	DEFB135	Beta-defensin135	0	0
UDAMP48	DEFB136	Beta-defensin136	0	0
UDAMP49	PRG2	Bone marrow proteoglycan	0	No significant change
UDAMP50	BST2	Bone marrow stromal antigen 2	0	No significant change
UDAMP51	BPIFA1	BPI fold-containing family A member 1 precursor	0	No significant change
UDAMP52	BPIFA2	BPI fold-containing family A member 2 (Parotid secretory protein) (PSP) (Short palate, lung and nasal epithelium carcinoma-associated protein 2)	0	0
UDAMP53	BPIFB3	BPI fold-containing family B member 3	0	0
UDAMP54	BPIFB4	BPI fold-containing family B member 4	0	0
UDAMP55	CALCA	Calcitonin gene-related peptide 1	0	No significant change
UDAMP56	CAMP	Cathelicidin antimicrobial peptide	0	No significant change
UDAMP57	CTSG	Cathepsin G	0	No significant change
UDAMP58	CCL1	C-C motif chemokine 1	0	0
UDAMP59	CCL13	C-C motif chemokine 13	0	0
UDAMP60	CCL17	C-C motif chemokine 17	0	No significant change
UDAMP61	CCL18	C-C motif chemokine 18	0	No significant change
UDAMP62	CCL19	C-C motif chemokine 19	0	0
UDAMP63	CCL20	C-C motif chemokine 20	0	0
UDAMP64	CCL21	C-C motif chemokine 21	0	0
UDAMP65	CCL22	C-C motif chemokine 22	0	0
UDAMP66	CCL24	C-C motif chemokine 24	0	0
UDAMP67	CCL25	C-C motif chemokine 25	0	0
UDAMP68	CCL27	C-C motif chemokine 27	0	0
UDAMP69	CCL28	C-C motif chemokine 28	0	0
UDAMP70	CCL4	C-C motif chemokine 4	0	0
UDAMP71	CCL8	C-C motif chemokine 8	0	0
UDAMP72	CHGA	Chromogranin-A	0	No significant change
UDAMP73	CLU	Clusterin	Decreased	No significant change
UDAMP74	CXCL10	C-X-C motif chemokine 10	0	0
UDAMP75	CXCL11	C-X-C motif chemokine 11	0	0
UDAMP76	CXCL13	C-X-C motif chemokine 13	0	0
UDAMP77	CXCL14	C-X-C motif chemokine 14	0	0
UDAMP78	CXCL2	C-X-C motif chemokine 2	0	No significant change
UDAMP79	CXCL3	C-X-C motif chemokine 3	0	0
UDAMP80	CXCL6	C-X-C motif chemokine 6	0	0
UDAMP81	CXCL9	C-X-C motif chemokine 9	0	0
UDAMP82	CST11	Cystatin-11	0	0
UDAMP83	CST5	Cystatin-D	0	0
UDAMP84	CST4	Cystatin-S	0	No significant change
UDAMP85	CST2	Cystatin-SA	0	No significant change
UDAMP86	CST1	Cystatin-SN	0	No significant change
UDAMP87	DEFA3	Defensin, alpha 3, neutrophil-specific	0	No significant change
UDAMP88	DEFA5	Defensin-5	0	No significant change
UDAMP89	DEFA6	Defensin-6	0	No significant change
UDAMP90	DMBT1	Deleted in malignant brain tumors 1 protein	0	No significant change
UDAMP91	DCD	Dermcidin	0	No significant change
UDAMP92	APOBEC3G	DNA dC->dU-editing enzyme APOBEC-3G	0	0
UDAMP93	PI3	Elafin	0	No significant change
UDAMP94	RNASE3	Eosinophil cationic protein	0	No significant change
UDAMP95	CCL11	Eotaxin	0	0
UDAMP96	LACRT	Extracellular glycoprotein lacritin	0	0
UDAMP97	FGA	Fibrinogen alpha chain	Increased	No significant change
UDAMP98	FLG2	Filaggrin-2	0	0
UDAMP99	FURIN	Furin	0	No significant change
UDAMP100	GALP	Galanin-like peptide	0	0
UDAMP101	LGALS3	Galectin-3	0	No significant change
UDAMP102	GAPDH	Glyceraldehyde-3-phosphate dehydrogenase	0	No significant change
UDAMP103	GNLY	Granulysin	0	0
UDAMP104	CXCL1	Growth-regulated alpha protein	0	No significant change
UDAMP105	GBP1	Guanylate-binding protein 1	0	No significant change
UDAMP106	GBP2	Guanylate-binding protein 2	0	No significant change
UDAMP107	HP	Haptoglobin beta chain	Decreased	No significant change
UDAMP108	SERPIND1	Heparin cofactor 2	0	No significant change
UDAMP109	HAMP	Hepcidin	0	No significant change
UDAMP110	HAMP	Hepicidin-20	0	No significant change
UDAMP111	HTN1	Histatin-1	0	0
UDAMP112	HTN3	Histatin-3	0	0
UDAMP113	HTN3	Histatin-5	0	0
UDAMP114	HTN3	Histatin-8	0	0
UDAMP115	HRG	Histidine-rich glycoprotein	0	No significant change
UDAMP116	H2AFJ	Histone H2A.J	0	0
UDAMP117	HIST1H2BC	Histone H2B type 1-C/E/F/G/I	0	0
UDAMP118	HRNR	Hornerin	0	0
UDAMP119	IFNA2	Interferon alpha-2	0	0
UDAMP120	IFNL3	Interferon lambda-3	0	0
UDAMP121	MX1	Interferon-induced GTP-binding protein Mx1	0	0
UDAMP122	IFIH1	Interferon-induced helicase C domain-containing protein 1	0	0
UDAMP123	ISG20	Interferon-stimulated gene 20 kDa protein	0	0
UDAMP124	IL26	Interleukin-26	0	0
UDAMP125	CXCL8	Interleukin-8	0	0
UDAMP126	IAPP	Islet amyloid polypeptide	0	0
UDAMP127	KLK5	Kallikrein-5	0	0
UDAMP128	KRT6C	Keratin, type II cytoskeletal 6C	0	0
UDAMP129	KNG1	Kininogen-1	0	No significant change
UDAMP130	LTF	Lactotransferrin	0	No significant change
UDAMP131	LCN1	Lipocalin-1	0	No significant change
UDAMP132	LEAP2	Liver-expressed antimicrobial peptide 2	0	No significant change
UDAMP133	XCL1	Lymphotactin	0	No significant change
UDAMP134	LYZ	Lysozyme C	0	No significant change
UDAMP135	SCGB2A1	Mammaglobin-B	0	0
UDAMP136	POMC	Melanocyte-stimulating hormone alpha(Pro-opiomelanocortin)	0	No significant change
UDAMP137	MUC7	Mucin-7	0	0
UDAMP138	NPPB	Natriuretic peptides B	0	No significant change
UDAMP139	NPY	Neuropeptide Y	0	No significant change
UDAMP140	VGF	Neurosecretory protein VGF	0	No significant change
UDAMP141	NTS	Neurotensin	0	0
UDAMP142	DEFA1	Neutrophil defensin 1	0	No significant change
UDAMP143	DEFA3	Neutrophil defensin 3	0	No significant change
UDAMP144	DEFA4	Neutrophil defensin 4	0	No significant change
UDAMP145	LCN2	Neutrophil gelatinase-associated lipocalin	0	No significant change
UDAMP146	HMGN2	Non-histone chromosomal protein HMG-17	0	No significant change
UDAMP147	PYY	Peptide YY	0	0
UDAMP148	PGLYRP3	Peptidoglycan recognition protein 3	0	0
UDAMP149	PGLYRP4	Peptidoglycan recognition protein 4	0	0
UDAMP150	PRF1	Perforin-1	0	0
UDAMP151	PLA2G2A	Phospholipase A2, membrane associated	0	No significant change
UDAMP152	PPBP	Platelet Basic protein	Decreased	No significant change
UDAMP153	PF4	Platelet factor 4	0	No significant change
UDAMP154	PIGR	Polymeric immunoglobulin receptor	0	No significant change
UDAMP155	PRR4	Proline-rich protein 4	0	No significant change
UDAMP156	TOR2A	Prosalusin	0	No significant change
UDAMP157	TAC1	Protachykinin-1	0	0
UDAMP158	GPR15L	Protein GPR15L	0	0
UDAMP159	S100A12	Protein S100-A12	0	No significant change
UDAMP160	S100A7	Protein S100-A7	0	0
UDAMP161	S100A9	Protein S100-A9	Decreased	No significant change
UDAMP162	F2	Prothrombin	0	No significant change
UDAMP163	IQGAP2	Ras GTPase-activating-like protein IQGAP2	0	No significant change
UDAMP164	ROMO1	Reactive oxygen species modulator 1	0	0
UDAMP165	REG3A	Regenerating islet-derived protein 3-alpha	0	No significant change
UDAMP166	RETN	Resistin	0	No significant change
UDAMP167	RARRES2	Retinoic acid receptor responder protein 2	0	No significant change
UDAMP168	DLC1	Rho GTPase-activating protein 7	0	No significant change
UDAMP169	RNASE8	Ribonuclease 8	0	0
UDAMP170	RNASE6	Ribonuclease K6	0	No significant change
UDAMP171	RNASE7	Ribonuclease7	0	0
UDAMP172	SALV	Salivary gland antimicrobial salvic	0	0
UDAMP173	SCGB1D1	Secretoglobin family 1D member 1	0	0
UDAMP174	SEMG1	Semenogelin-1	0	0
UDAMP175	SEMG2	Semenogelin-2	0	No significant change
UDAMP176	SPINK9	Serine protease inhibitor Kazal-type 9	0	0
UDAMP177	SPAG11B	Sperm-associated antigen 11B	0	0
UDAMP178	CXCL12	Stromal cell-derived factor 1	0	No significant change
UDAMP179	DCD	Survival-promoting peptide, Y-P30	0	No significant change
UDAMP180	TSLP	Thymic stromal lymphopoietin	0	0
UDAMP181	SP1	Transcription factor Sp1	0	0
UDAMP182	VIP	VIP peptides	0	0
UDAMP183	WFDC12	WAP four-disulfide core domain protein12	0	0
UDAMP184	AZGP1	Zinc-alpha-2-glycoprotein	Decreased	No significant change
UDAMP185	ZG16B	Zymogen granule protein 16 homolog B	0	No significant change

## Sheet: CSF
UDAMP ID	Gene Name	Protein Name	PXD008098	PXD012851
UDAMP1	FAU	40S ribosomal protein S30	0	0
UDAMP2	ADM	Adrenomedullin	No significant change	No significant change
UDAMP3	SERPINA1	Alpha-1-antitrypsin	No significant change	No significant change
UDAMP4	SNCA	Alpha-synuclein	No significant change	0
UDAMP5	APP	Amyloid-beta precursor protein	No significant change	No significant change
UDAMP6	ANG	Angiogenin	No significant change	No significant change
UDAMP7	SLPI	Antileukoproteinase	Increased	No significant change
UDAMP8	ATP5F1B	ATP synthase subunit beta, mitochondrial	0	0
UDAMP9	AZU1	Azurocidin	0	0
UDAMP10	BPI	Bactericidal permeability-increasing protein	0	0
UDAMP11	B2M	Beta-2-microglobulin	Increased	No significant change
UDAMP12	CSN2	Beta-casein	0	0
UDAMP13	DEFB105B	Beta-defensin	0	0
UDAMP14	DEFB117	Beta-defensin	0	0
UDAMP15	DEFB1	Beta-defensin 1	0	No significant change
UDAMP16	DEFB104A	Beta-defensin 104	0	0
UDAMP17	DEFB105A	Beta-defensin 105	0	0
UDAMP18	DEFB106A	Beta-defensin 106	0	0
UDAMP19	DEFB107A	Beta-defensin 107	0	0
UDAMP20	DEFB108A	Beta-defensin 108A	0	0
UDAMP21	DEFB112	Beta-defensin 112	0	0
UDAMP22	DEFB118	Beta-defensin 118	0	0
UDAMP23	DEFB119	Beta-defensin 119	0	0
UDAMP24	DEFB125	Beta-defensin 125	0	0
UDAMP25	DEFB126	Beta-defensin 126	0	0
UDAMP26	DEFB127	Beta-defensin 127	0	0
UDAMP27	DEFB128	Beta-defensin 128	0	0
UDAMP28	DEFB130	Beta-defensin 130	0	0
UDAMP29	DEFB4A	Beta-defensin 4A	0	0
UDAMP30	DEFB103A	Beta-defensin103	0	0
UDAMP31	DEFB108B	Beta-defensin108B	0	0
UDAMP32	DEFB109B	Beta-defensin109	0	0
UDAMP33	DEFB110	Beta-defensin111	0	0
UDAMP34	DEFB113	Beta-defensin113	0	0
UDAMP35	DEFB114	Beta-defensin114	0	0
UDAMP36	DEFB115	Beta-defensin115	0	0
UDAMP37	DEFB116	Beta-defensin116	0	0
UDAMP38	DEFB121	Beta-defensin121	0	0
UDAMP39	DEFB123	Beta-defensin123	0	0
UDAMP40	DEFB124	Beta-defensin124	0	0
UDAMP41	DEFB128	Beta-defensin128	0	0
UDAMP42	DEFB129	Beta-defensin129	0	0
UDAMP43	DEFB131A	Beta-defensin131A	0	0
UDAMP44	DEFB132	Beta-defensin132	0	0
UDAMP45	DEFB133	Beta-defensin133	0	0
UDAMP46	DEFB134	Beta-defensin134	0	0
UDAMP47	DEFB135	Beta-defensin135	0	0
UDAMP48	DEFB136	Beta-defensin136	0	0
UDAMP49	PRG2	Bone marrow proteoglycan	No significant change	0
UDAMP50	BST2	Bone marrow stromal antigen 2	No significant change	0
UDAMP51	BPIFA1	BPI fold-containing family A member 1 precursor	0	0
UDAMP52	BPIFA2	BPI fold-containing family A member 2 (Parotid secretory protein) (PSP) (Short palate, lung and nasal epithelium carcinoma-associated protein 2)	0	0
UDAMP53	BPIFB3	BPI fold-containing family B member 3	0	0
UDAMP54	BPIFB4	BPI fold-containing family B member 4	0	0
UDAMP55	CALCA	Calcitonin gene-related peptide 1	No significant change	0
UDAMP56	CAMP	Cathelicidin antimicrobial peptide	0	0
UDAMP57	CTSG	Cathepsin G	0	0
UDAMP58	CCL1	C-C motif chemokine 1	0	0
UDAMP59	CCL13	C-C motif chemokine 13	0	0
UDAMP60	CCL17	C-C motif chemokine 17	0	0
UDAMP61	CCL18	C-C motif chemokine 18	0	0
UDAMP62	CCL19	C-C motif chemokine 19	0	0
UDAMP63	CCL20	C-C motif chemokine 20	0	0
UDAMP64	CCL21	C-C motif chemokine 21	No significant change	0
UDAMP65	CCL22	C-C motif chemokine 22	0	0
UDAMP66	CCL24	C-C motif chemokine 24	0	0
UDAMP67	CCL25	C-C motif chemokine 25	0	0
UDAMP68	CCL27	C-C motif chemokine 27	0	0
UDAMP69	CCL28	C-C motif chemokine 28	0	0
UDAMP70	CCL4	C-C motif chemokine 4	0	0
UDAMP71	CCL8	C-C motif chemokine 8	0	0
UDAMP72	CHGA	Chromogranin-A	No significant change	No significant change
UDAMP73	CLU	Clusterin	No significant change	No significant change
UDAMP74	CXCL10	C-X-C motif chemokine 10	0	0
UDAMP75	CXCL11	C-X-C motif chemokine 11	0	0
UDAMP76	CXCL13	C-X-C motif chemokine 13	0	0
UDAMP77	CXCL14	C-X-C motif chemokine 14	0	0
UDAMP78	CXCL2	C-X-C motif chemokine 2	0	0
UDAMP79	CXCL3	C-X-C motif chemokine 3	0	0
UDAMP80	CXCL6	C-X-C motif chemokine 6	0	0
UDAMP81	CXCL9	C-X-C motif chemokine 9	0	0
UDAMP82	CST11	Cystatin-11	0	0
UDAMP83	CST5	Cystatin-D	0	0
UDAMP84	CST4	Cystatin-S	0	0
UDAMP85	CST2	Cystatin-SA	0	0
UDAMP86	CST1	Cystatin-SN	No significant change	No significant change
UDAMP87	DEFA3	Defensin, alpha 3, neutrophil-specific	Increased	0
UDAMP88	DEFA5	Defensin-5	0	0
UDAMP89	DEFA6	Defensin-6	0	0
UDAMP90	DMBT1	Deleted in malignant brain tumors 1 protein	0	0
UDAMP91	DCD	Dermcidin	No significant change	0
UDAMP92	APOBEC3G	DNA dC->dU-editing enzyme APOBEC-3G	0	0
UDAMP93	PI3	Elafin	No significant change	0
UDAMP94	RNASE3	Eosinophil cationic protein	0	0
UDAMP95	CCL11	Eotaxin	0	0
UDAMP96	LACRT	Extracellular glycoprotein lacritin	0	0
UDAMP97	FGA	Fibrinogen alpha chain	No significant change	No significant change
UDAMP98	FLG2	Filaggrin-2	No significant change	0
UDAMP99	FURIN	Furin	No significant change	0
UDAMP100	GALP	Galanin-like peptide	0	0
UDAMP101	LGALS3	Galectin-3	No significant change	0
UDAMP102	GAPDH	Glyceraldehyde-3-phosphate dehydrogenase	No significant change	0
UDAMP103	GNLY	Granulysin	0	0
UDAMP104	CXCL1	Growth-regulated alpha protein	0	0
UDAMP105	GBP1	Guanylate-binding protein 1	0	0
UDAMP106	GBP2	Guanylate-binding protein 2	0	0
UDAMP107	HP	Haptoglobin beta chain	No significant change	No significant change
UDAMP108	SERPIND1	Heparin cofactor 2	No significant change	No significant change
UDAMP109	HAMP	Hepcidin	0	0
UDAMP110	HAMP	Hepicidin-20	0	0
UDAMP111	HTN1	Histatin-1	0	0
UDAMP112	HTN3	Histatin-3	0	0
UDAMP113	HTN3	Histatin-5	0	0
UDAMP114	HTN3	Histatin-8	0	0
UDAMP115	HRG	Histidine-rich glycoprotein	No significant change	0
UDAMP116	H2AFJ	Histone H2A.J	0	0
UDAMP117	HIST1H2BC	Histone H2B type 1-C/E/F/G/I	0	0
UDAMP118	HRNR	Hornerin	Increased	0
UDAMP119	IFNA2	Interferon alpha-2	0	0
UDAMP120	IFNL3	Interferon lambda-3	0	0
UDAMP121	MX1	Interferon-induced GTP-binding protein Mx1	0	0
UDAMP122	IFIH1	Interferon-induced helicase C domain-containing protein 1	0	0
UDAMP123	ISG20	Interferon-stimulated gene 20 kDa protein	0	0
UDAMP124	IL26	Interleukin-26	0	0
UDAMP125	CXCL8	Interleukin-8	0	0
UDAMP126	IAPP	Islet amyloid polypeptide	0	0
UDAMP127	KLK5	Kallikrein-5	0	0
UDAMP128	KRT6C	Keratin, type II cytoskeletal 6C	0	No significant change
UDAMP129	KNG1	Kininogen-1	No significant change	0
UDAMP130	LTF	Lactotransferrin	0	0
UDAMP131	LCN1	Lipocalin-1	0	0
UDAMP132	LEAP2	Liver-expressed antimicrobial peptide 2	No significant change	0
UDAMP133	XCL1	Lymphotactin	0	0
UDAMP134	LYZ	Lysozyme C	0	No significant change
UDAMP135	SCGB2A1	Mammaglobin-B	0	0
UDAMP136	POMC	Melanocyte-stimulating hormone alpha(Pro-opiomelanocortin)	No significant change	0
UDAMP137	MUC7	Mucin-7	0	0
UDAMP138	NPPB	Natriuretic peptides B	No significant change	0
UDAMP139	NPY	Neuropeptide Y	0	No significant change
UDAMP140	VGF	Neurosecretory protein VGF	Decreased	No significant change
UDAMP141	NTS	Neurotensin	0	0
UDAMP142	DEFA1	Neutrophil defensin 1	Increased	No significant change
UDAMP143	DEFA3	Neutrophil defensin 3	Increased	No significant change
UDAMP144	DEFA4	Neutrophil defensin 4	0	0
UDAMP145	LCN2	Neutrophil gelatinase-associated lipocalin	No significant change	No significant change
UDAMP146	HMGN2	Non-histone chromosomal protein HMG-17	0	No significant change
UDAMP147	PYY	Peptide YY	0	0
UDAMP148	PGLYRP3	Peptidoglycan recognition protein 3	0	0
UDAMP149	PGLYRP4	Peptidoglycan recognition protein 4	0	0
UDAMP150	PRF1	Perforin-1	0	0
UDAMP151	PLA2G2A	Phospholipase A2, membrane associated	0	0
UDAMP152	PPBP	Platelet Basic protein	No significant change	0
UDAMP153	PF4	Platelet factor 4	0	0
UDAMP154	PIGR	Polymeric immunoglobulin receptor	No significant change	No significant change
UDAMP155	PRR4	Proline-rich protein 4	0	0
UDAMP156	TOR2A	Prosalusin	0	0
UDAMP157	TAC1	Protachykinin-1	Increased	0
UDAMP158	GPR15L	Protein GPR15L	0	0
UDAMP159	S100A12	Protein S100-A12	0	No significant change
UDAMP160	S100A7	Protein S100-A7	Increased	0
UDAMP161	S100A9	Protein S100-A9	No significant change	No significant change
UDAMP162	F2	Prothrombin	No significant change	No significant change
UDAMP163	IQGAP2	Ras GTPase-activating-like protein IQGAP2	0	0
UDAMP164	ROMO1	Reactive oxygen species modulator 1	0	0
UDAMP165	REG3A	Regenerating islet-derived protein 3-alpha	No significant change	0
UDAMP166	RETN	Resistin	0	0
UDAMP167	RARRES2	Retinoic acid receptor responder protein 2	No significant change	No significant change
UDAMP168	DLC1	Rho GTPase-activating protein 7	0	0
UDAMP169	RNASE8	Ribonuclease 8	0	0
UDAMP170	RNASE6	Ribonuclease K6	Increased	No significant change
UDAMP171	RNASE7	Ribonuclease7	0	0
UDAMP172	SALV	Salivary gland antimicrobial salvic	0	0
UDAMP173	SCGB1D1	Secretoglobin family 1D member 1	0	0
UDAMP174	SEMG1	Semenogelin-1	No significant change	0
UDAMP175	SEMG2	Semenogelin-2	0	0
UDAMP176	SPINK9	Serine protease inhibitor Kazal-type 9	0	0
UDAMP177	SPAG11B	Sperm-associated antigen 11B	0	0
UDAMP178	CXCL12	Stromal cell-derived factor 1	0	No significant change
UDAMP179	DCD	Survival-promoting peptide, Y-P30	No significant change	0
UDAMP180	TSLP	Thymic stromal lymphopoietin	0	0
UDAMP181	SP1	Transcription factor Sp1	0	0
UDAMP182	VIP	VIP peptides	Increased	0
UDAMP183	WFDC12	WAP four-disulfide core domain protein12	No significant change	0
UDAMP184	AZGP1	Zinc-alpha-2-glycoprotein	No significant change	No significant change
UDAMP185	ZG16B	Zymogen granule protein 16 homolog B	0	0
